# Supplementary material for: Buttressing volatile desktop grids with cloud resources within a reconfigurable environment service for workflow orchestration
Source: Springer Nature journal article supplement (doi:10.1186/2192-113x-3-1), 2014-01-01
Supplement: 13677_2013_40_MOESM8_ESM.pdf [file 13677_2013_40_MOESM8_ESM.pdf]

Number of work units

receptor.pdb

gpf descriptor file

Autogrid executables,  
Scripts (uploaded by the  
developer , don't change it)

ligand.pdb

dpf descriptor file

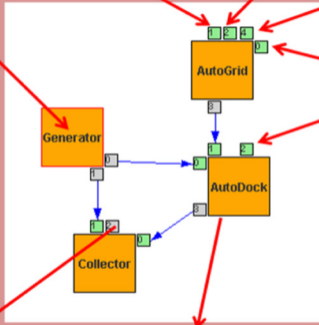

output pdb file

dlg files
